# Supplementary material
Source: Springer Nature journal article supplement (https://www.springermedizin.de/resource/supplementary/13075_2013_4448_MOESM5_ESM.pdf/10110428)

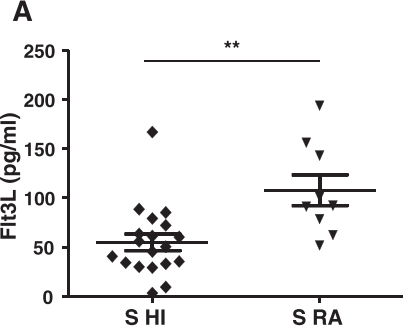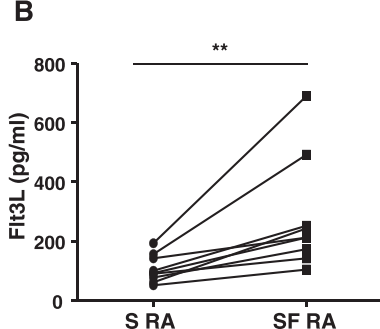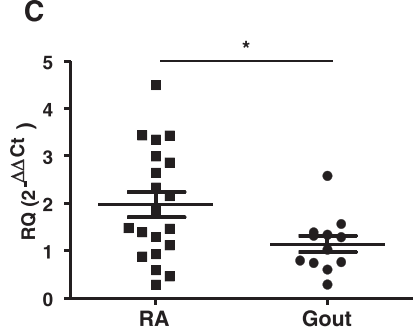

Supplement: MOESM5 [file 10110428]
